# Supplementary material
Source: MDPI journal article supplement (https://www.mdpi.com/2304-6740/11/10/377)
Supplement: s1 [file s1]

## Supporting Information

# **Mono-alkyl-substituted phosphinoboranes (HRP–BH<sub>2</sub>–NMe<sub>3</sub>) as precursors for poly(alkylphosphinoborane)s: improved synthesis and comparative study**

Felix Lehnfeld <sup>1</sup>, Tim Oswald <sup>2</sup>, Rüdiger Beckhaus <sup>2</sup> and Manfred Scheer <sup>1,\*</sup>

---

<sup>1</sup> Institut für Anorganische Chemie, Universität Regensburg, 93040 Regensburg, Germany;  
felix.lehnfeld@chemie.uni-regensburg.de

<sup>2</sup> Institut für Chemie, Carl von Ossietzky Universität Oldenburg, Carl-von-Ossietzky Straße 9–11,  
26129 Oldenburg, Germany; tim.oswald@uni-oldenburg.de (T.O.);  
ruediger.beckhaus@uni-oldenburg.de (R.B.)

\* Correspondence: manfred.scheer@ur.de

## NMR spectra

### 1.1 Compound 1a

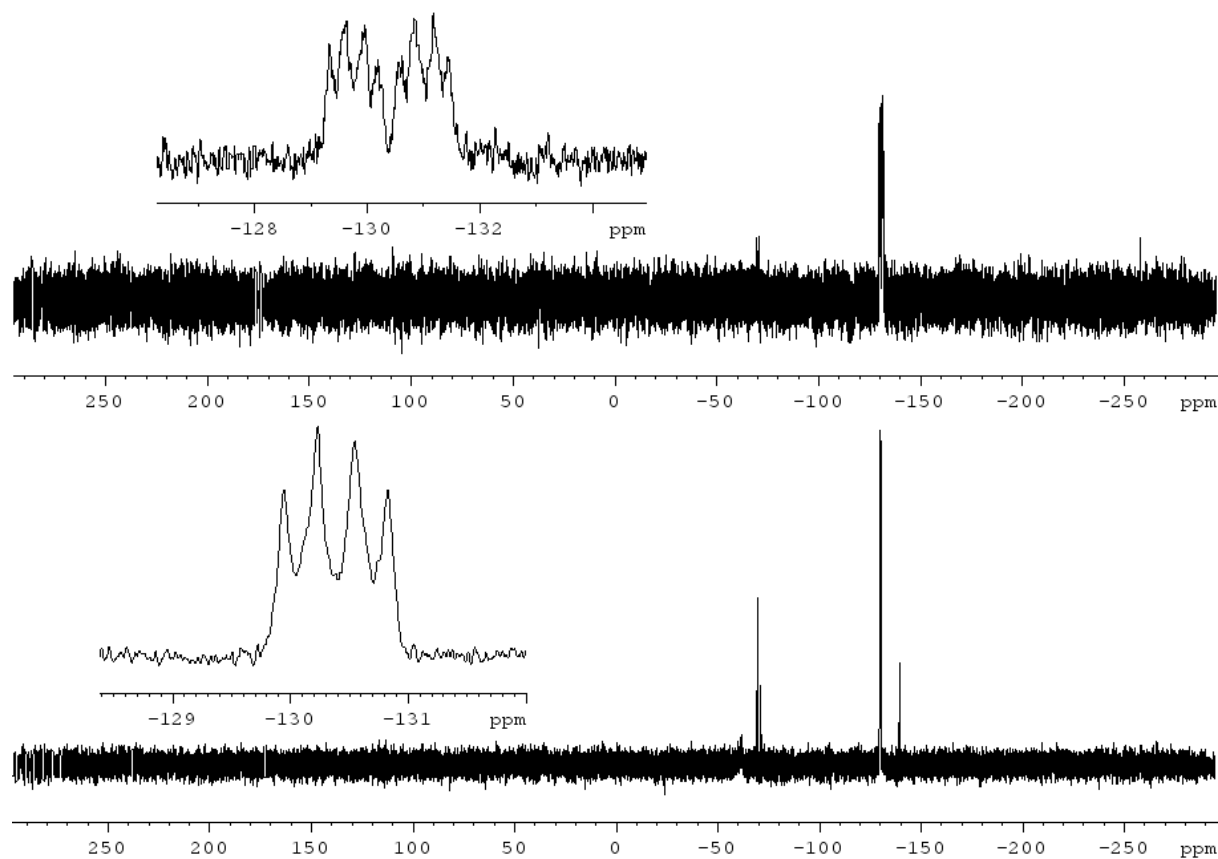

**Figure S1.**  $^{31}\text{P}$  NMR (top) and  $^{31}\text{P}\{^1\text{H}\}$  NMR (bottom) spectra of **1a** in *n*-hexane

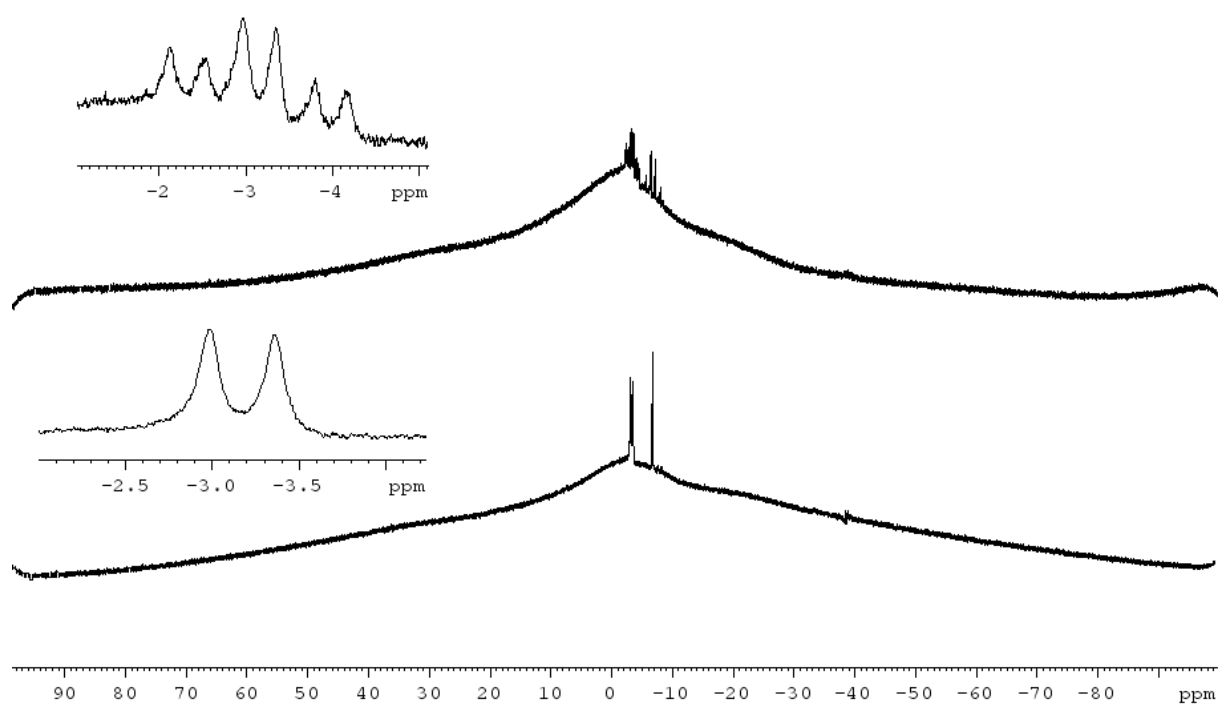

**Figure S2.**  $^{11}\text{B}$  NMR (top) and  $^{11}\text{B}\{^1\text{H}\}$  NMR (bottom) spectra of **1a** in *n*-hexane

## 1.2 Compound 1b

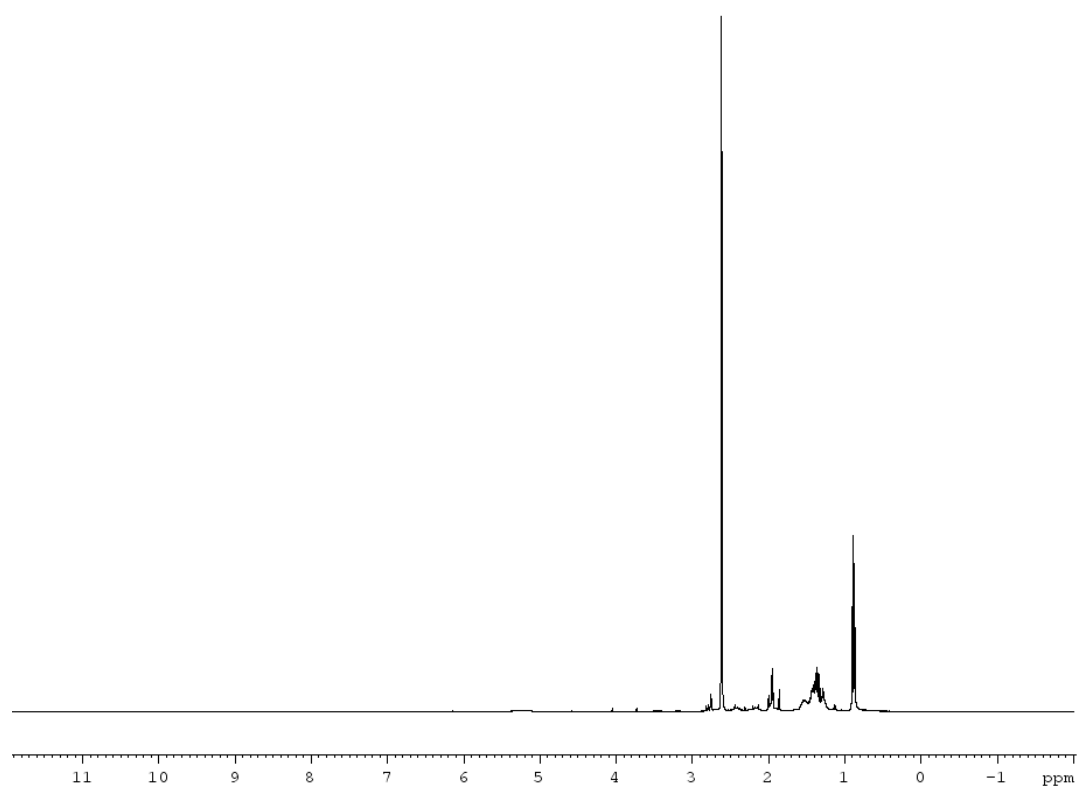

**Figure S3.**  $^1\text{H}$  NMR spectrum of **1b** in  $\text{CD}_3\text{CN}$

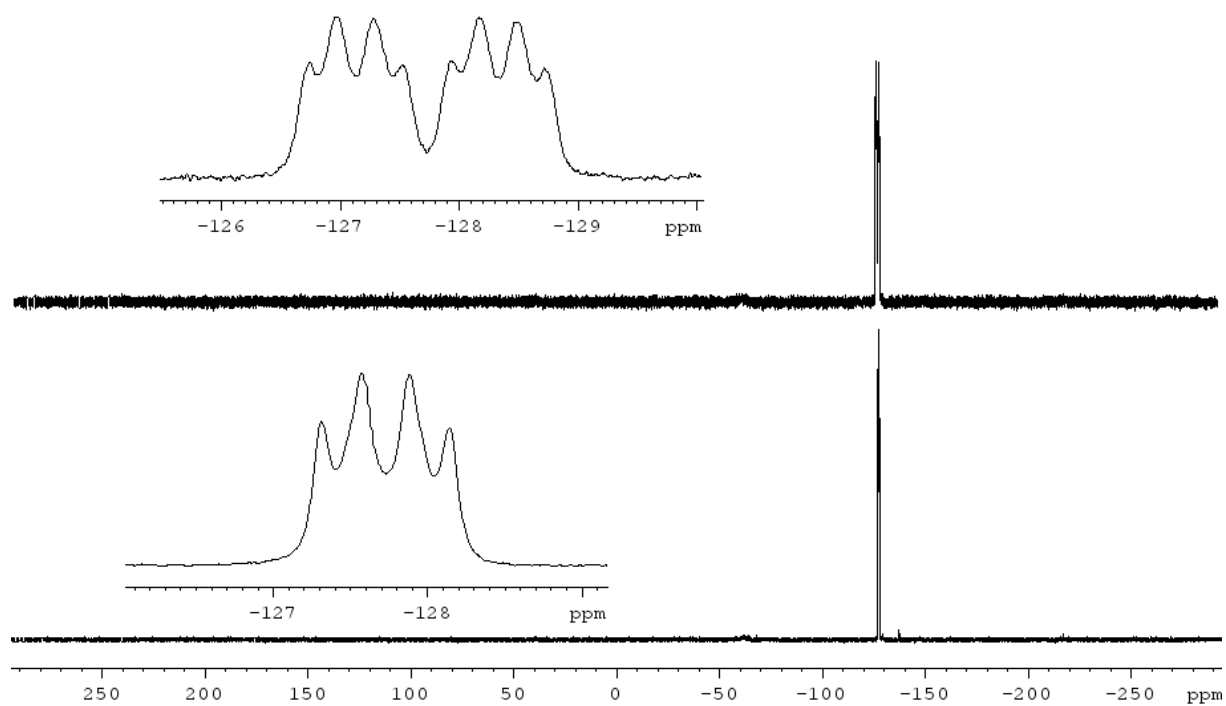

**Figure S4.**  $^{31}\text{P}$  NMR (top) and  $^{31}\text{P}\{^1\text{H}\}$  NMR (bottom) spectra of **1b** in  $\text{CD}_3\text{CN}$

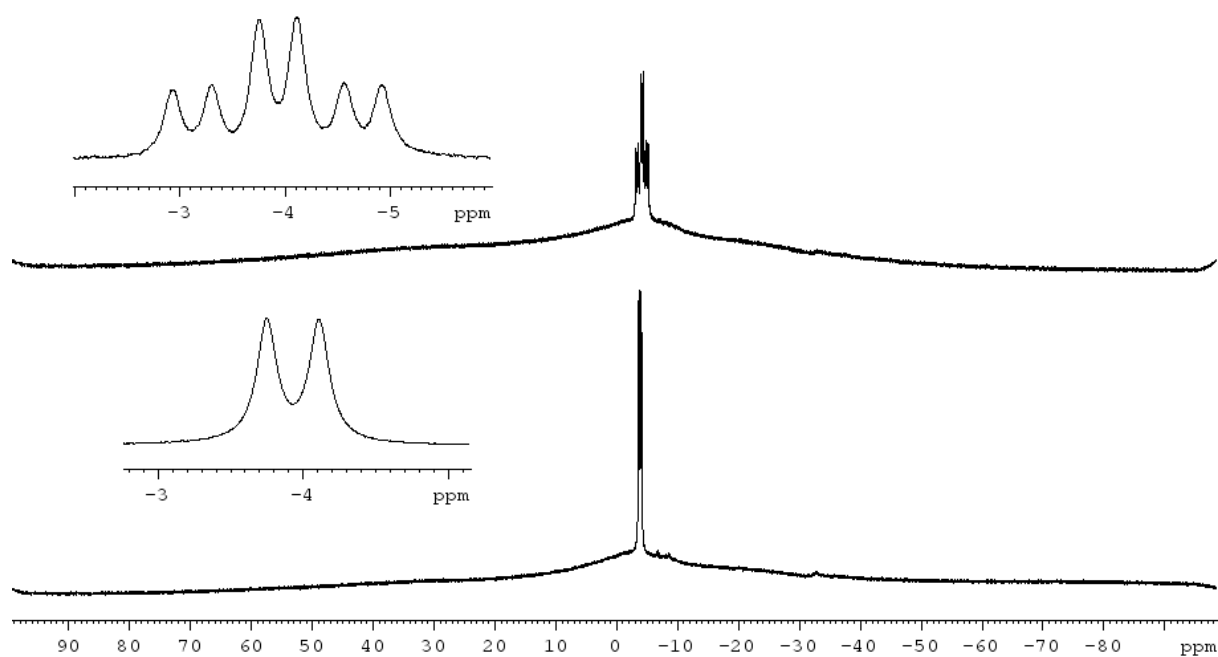

**Figure S5.**  $^{11}\text{B}$  NMR (top) and  $^{11}\text{B}\{^1\text{H}\}$  NMR (bottom) spectra of **1b** in  $\text{CD}_3\text{CN}$

## 2. Compound 1c

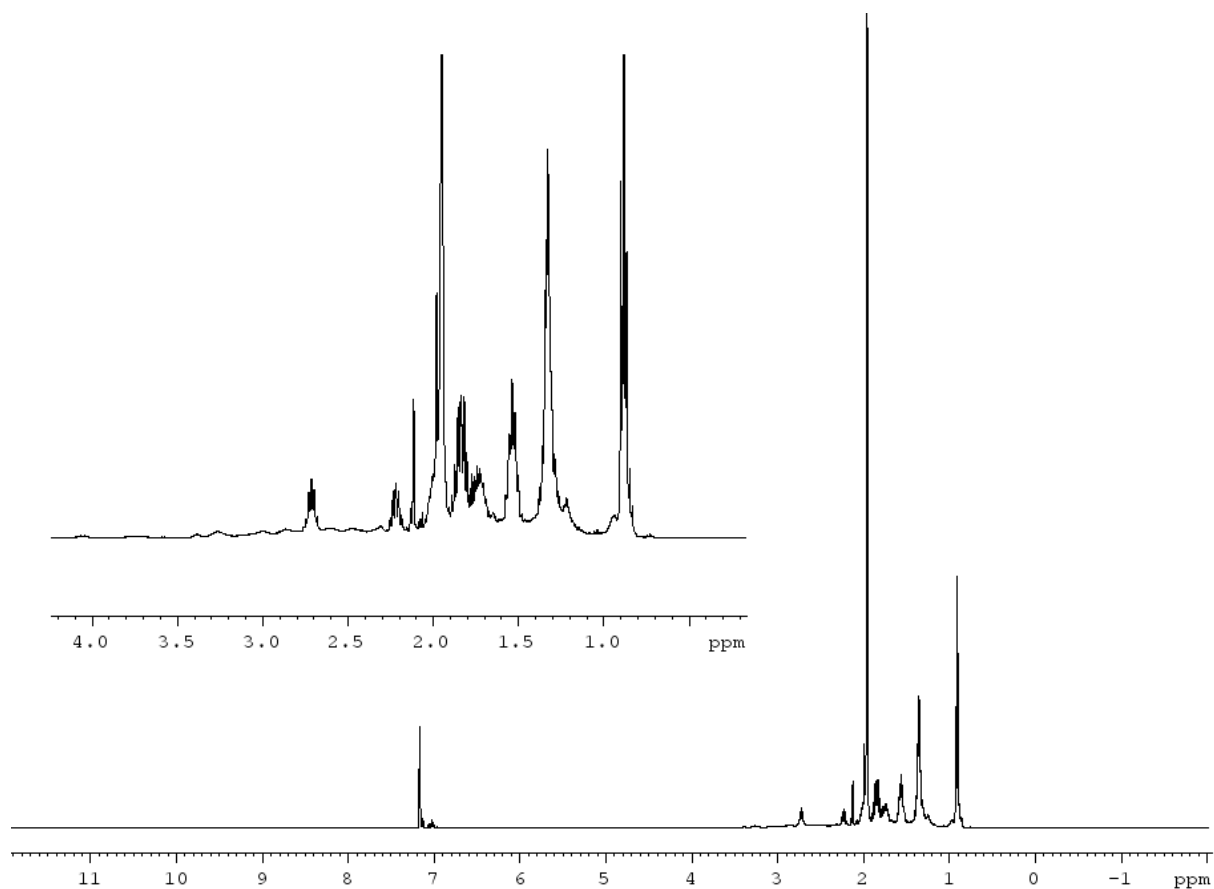

**Figure S6.**  $^1\text{H}$  NMR spectrum of **1c** in  $\text{C}_6\text{D}_6$

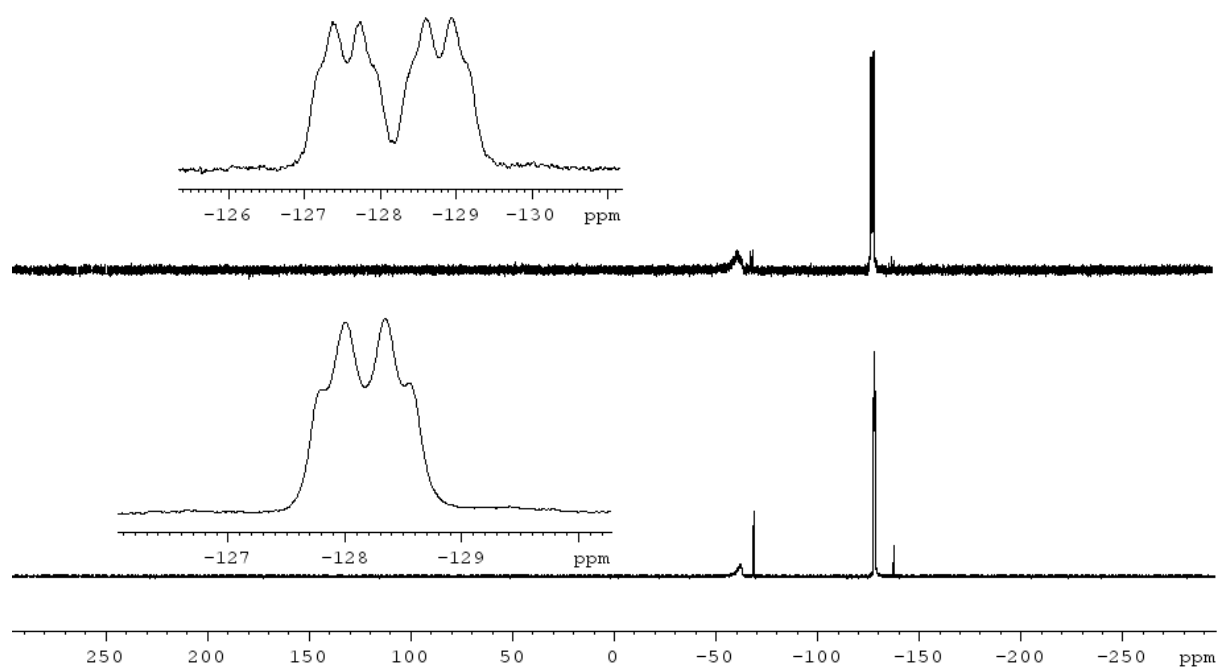

**Figure S7.**  $^{31}\text{P}$  NMR (top) and  $^{31}\text{P}\{^1\text{H}\}$  NMR (bottom) spectra of **1c** in  $\text{C}_6\text{D}_6$

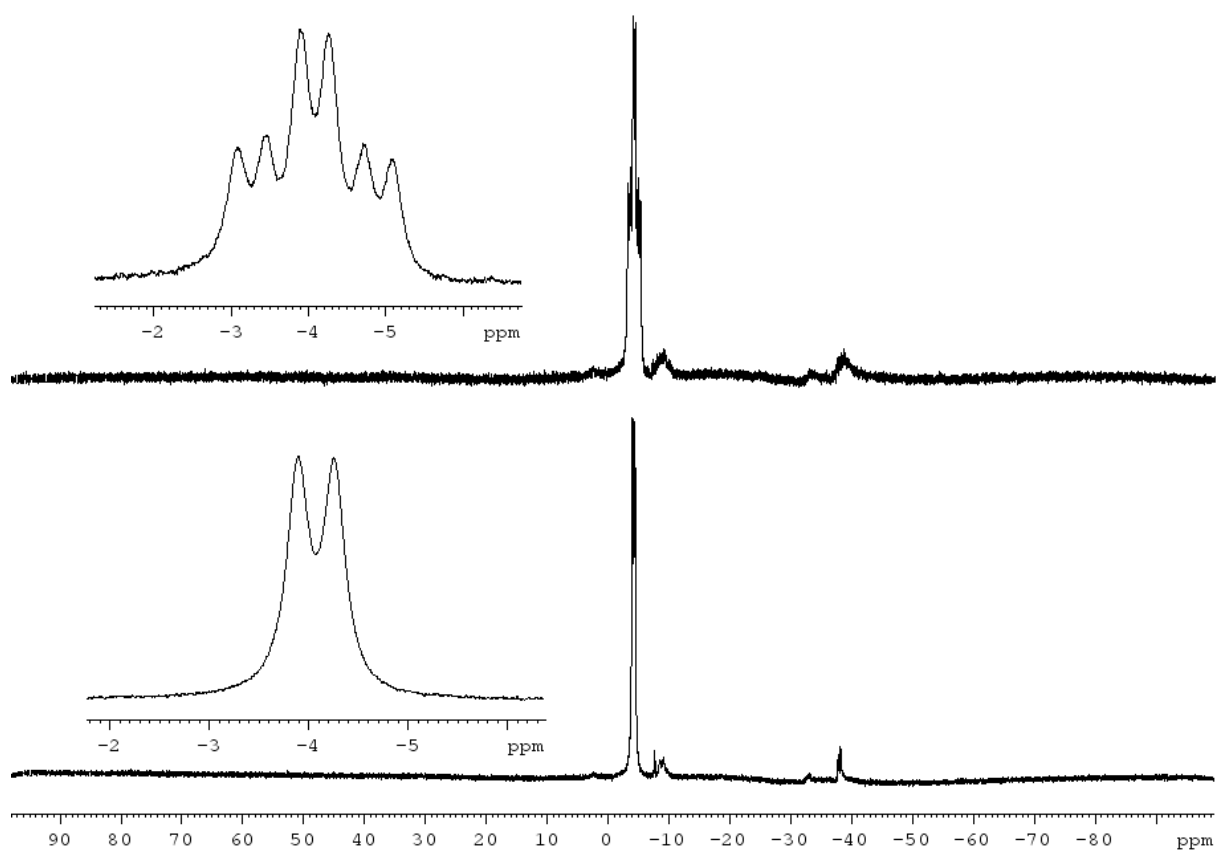

**Figure S8.**  $^{11}\text{B}$  NMR (top) and  $^{11}\text{B}\{^1\text{H}\}$  NMR (bottom) spectra of **1c** in  $\text{C}_6\text{D}_6$

## Compound 2

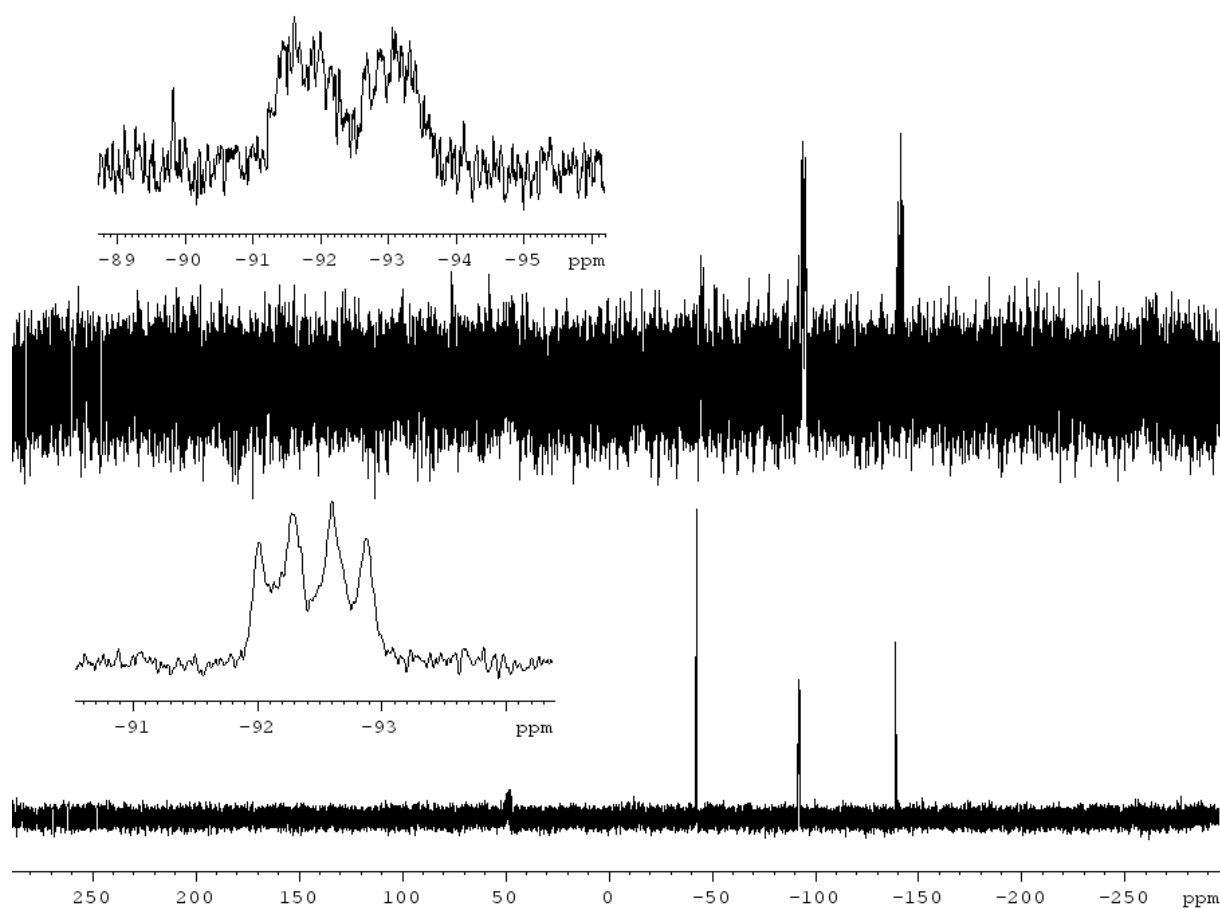

**Figure S9.**  $^{31}\text{P}$  NMR (top) and  $^{31}\text{P}\{^1\text{H}\}$  NMR (bottom) spectra of **2** in *n*-hexane

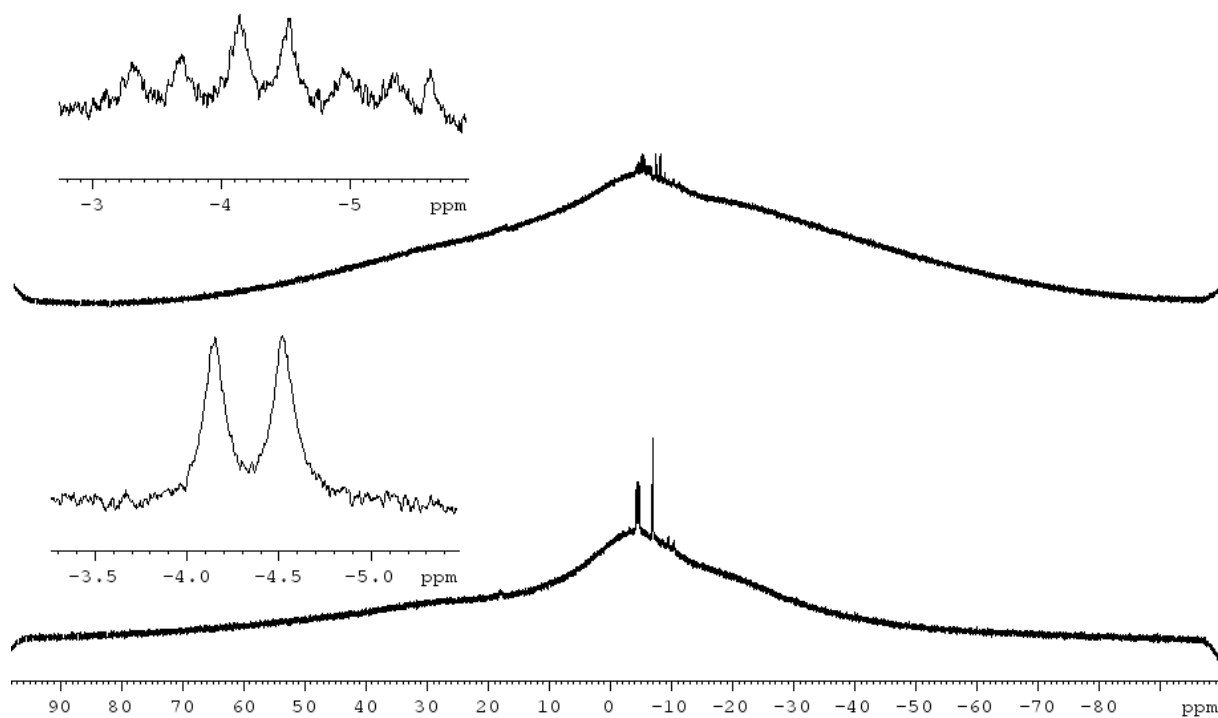

**Figure S10.**  $^{11}\text{B}$  NMR (top) and  $^{11}\text{B}\{^1\text{H}\}$  NMR (bottom) spectra of **2** in *n*-hexane

### 3. Compound 3a und 3b

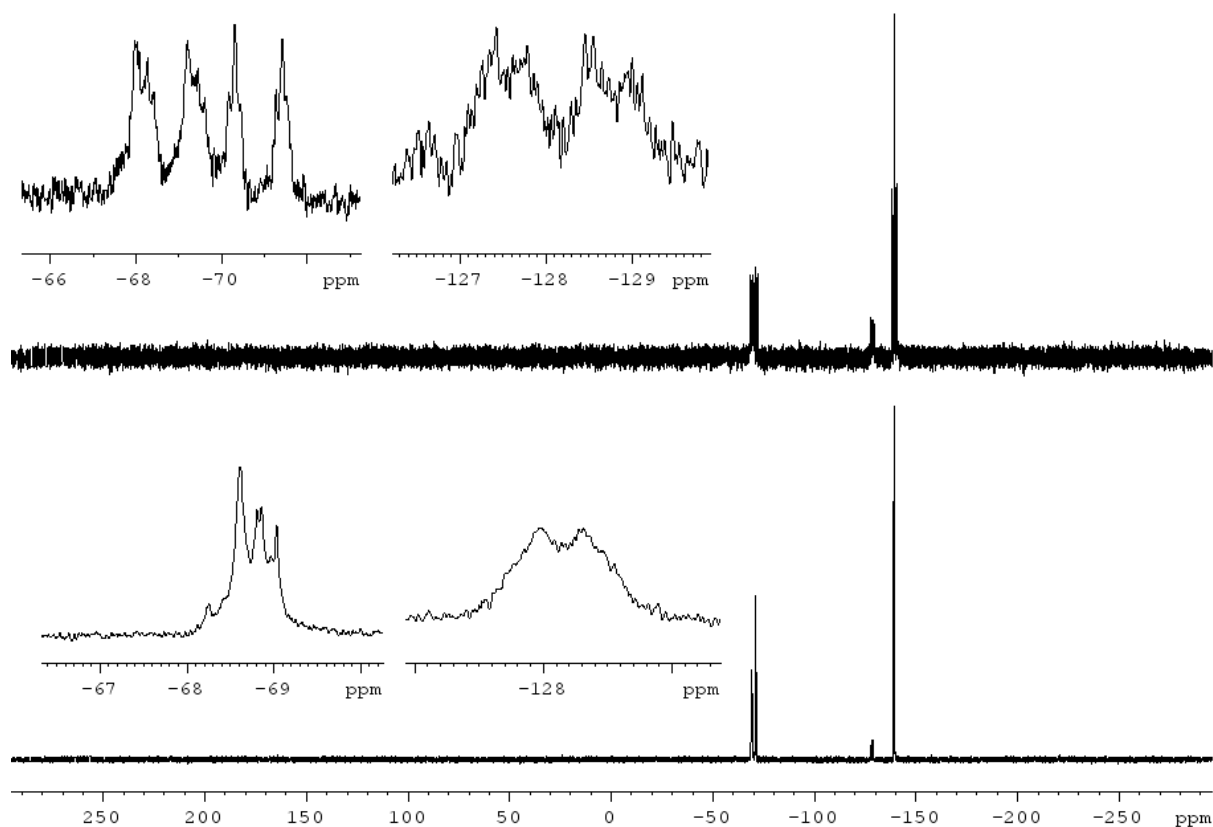

**Figure S11.**  $^{31}\text{P}$  NMR (top) and  $^{31}\text{P}\{^1\text{H}\}$  NMR (bottom) spectra of **3a** and **3b** in THF

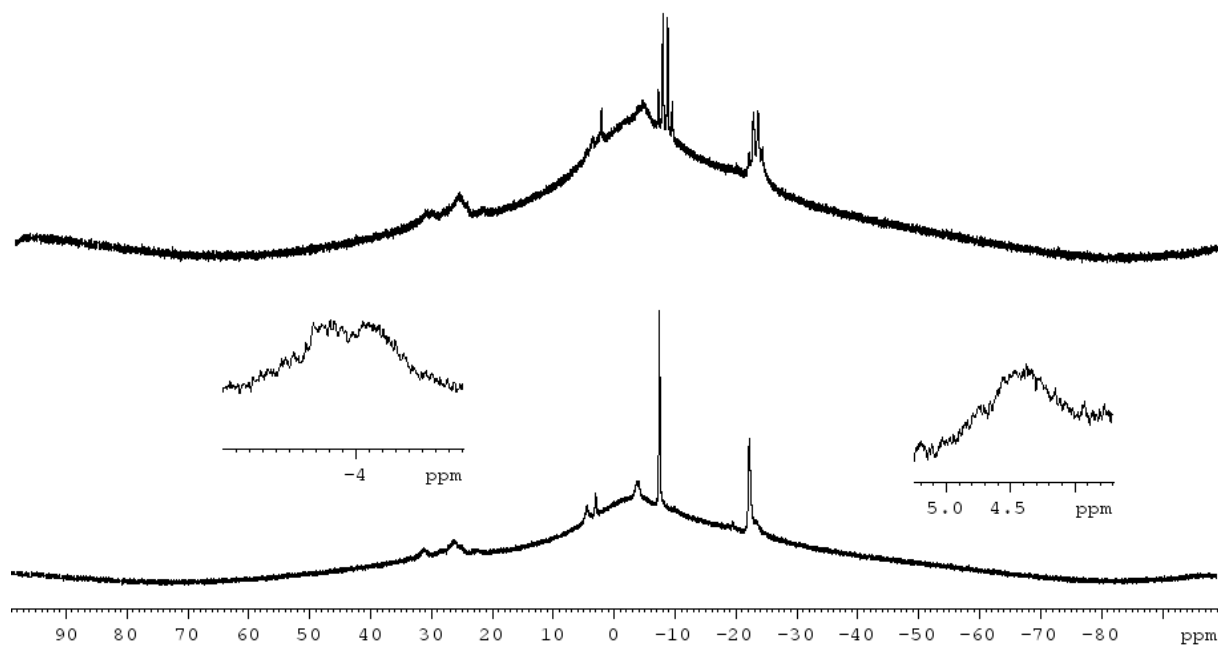

**Figure S12.**  $^{11}\text{B}$  NMR (top) and  $^{11}\text{B}\{^1\text{H}\}$  NMR (bottom) spectra of **3a** and **3b** in THF

### 3.1 Polymerization reactions

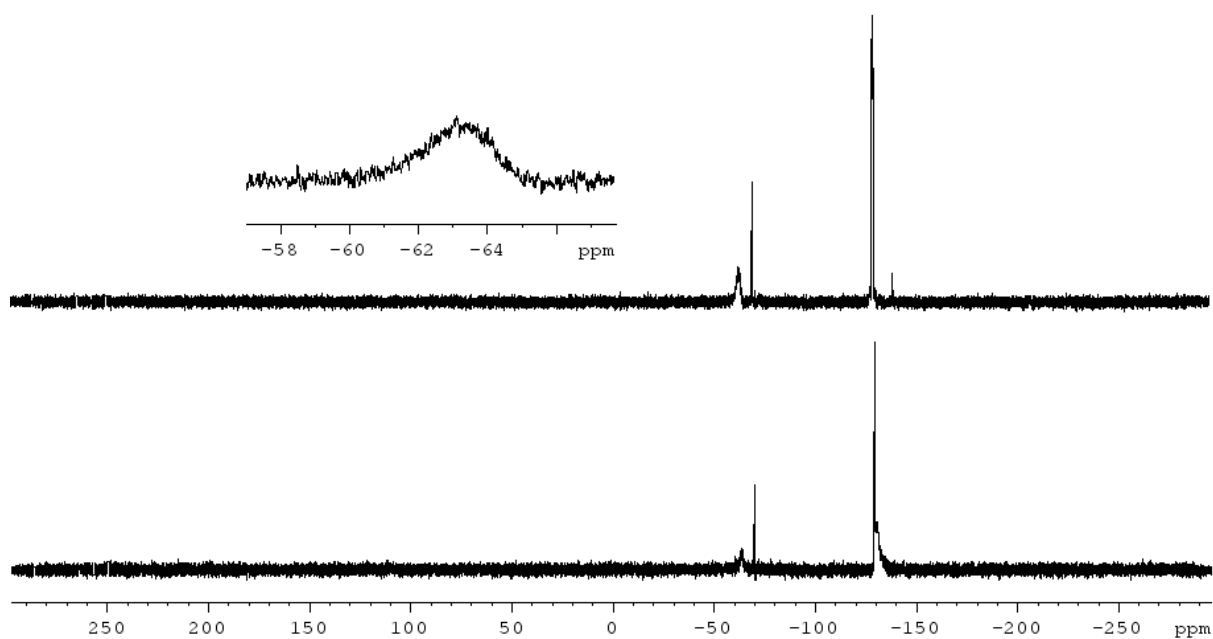

**Figure S13.**  $^{31}\text{P}\{^1\text{H}\}$  NMR spectra of **1a** ( $c = 0.089$  mol/L) after stirring at r.t. for 90 min (bottom) and 24 h (top)

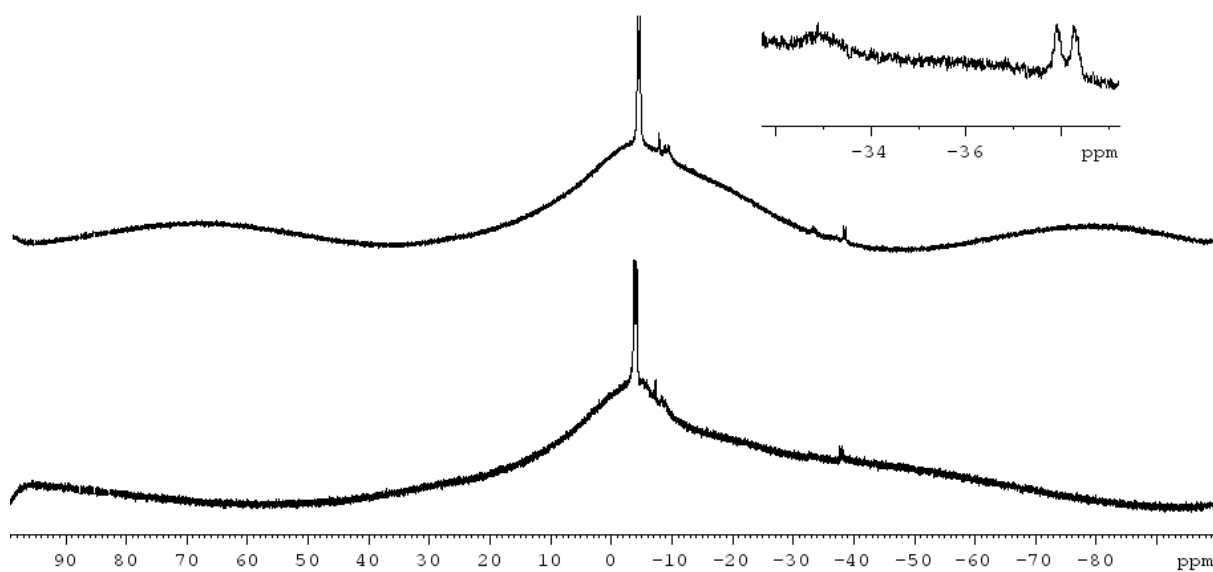

**Figure S14.**  $^{11}\text{B}\{^1\text{H}\}$  NMR spectra of **1a** ( $c = 0.089$  mol/L) after stirring at r.t. for 90 min (bottom) and 24 h (top)

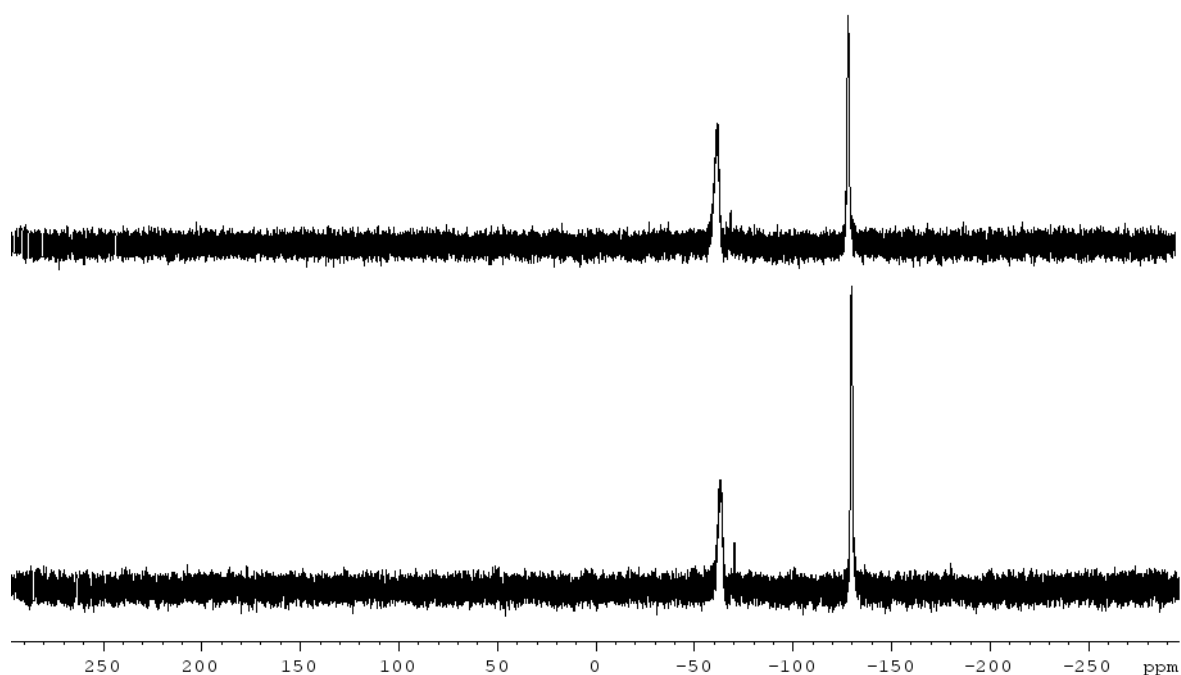

**Figure S15.**  $^{31}\text{P}\{^1\text{H}\}$  NMR spectra of **1a** ( $c = 0.089$  mol/L) after stirring at r.t. for 90 min (bottom) and 24 h (top) in the presence of 5 mol% of  $[(\eta^5\text{-}\eta^1\text{-C}_5\text{H}_4\text{C}_{10}\text{H}_{14})_2\text{Ti}]$ .

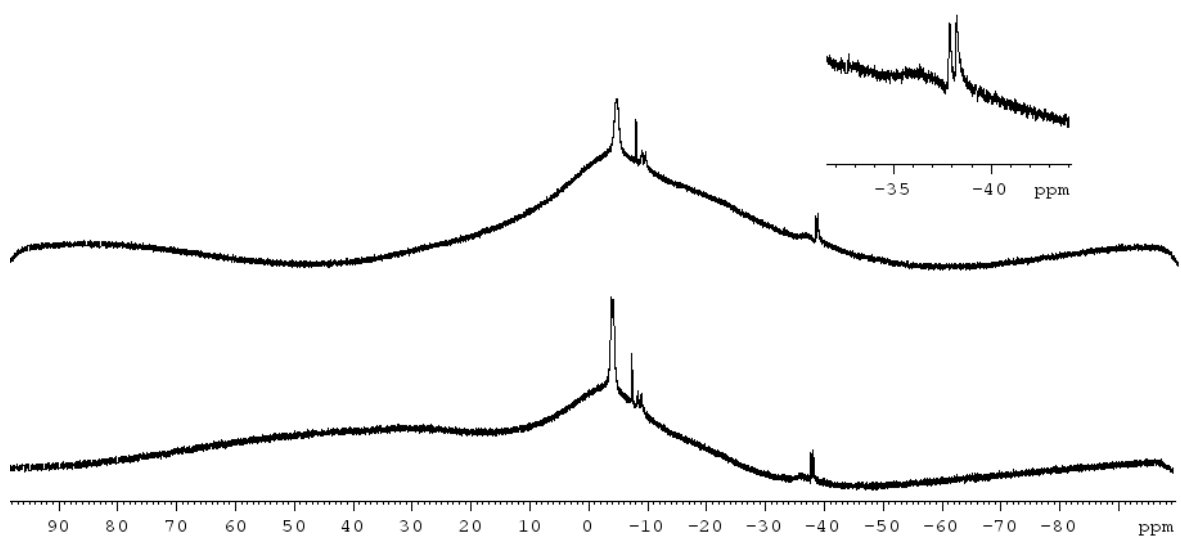

**Figure S16.**  $^{11}\text{B}\{^1\text{H}\}$  NMR spectra of **1a** ( $c = 0.089$  mol/L) after stirring at r.t. for 90 min (bottom) and 24 h (top) in the presence of 5 mol% of  $[(\eta^5\text{-}\eta^1\text{-C}_5\text{H}_4\text{C}_{10}\text{H}_{14})_2\text{Ti}]$ .

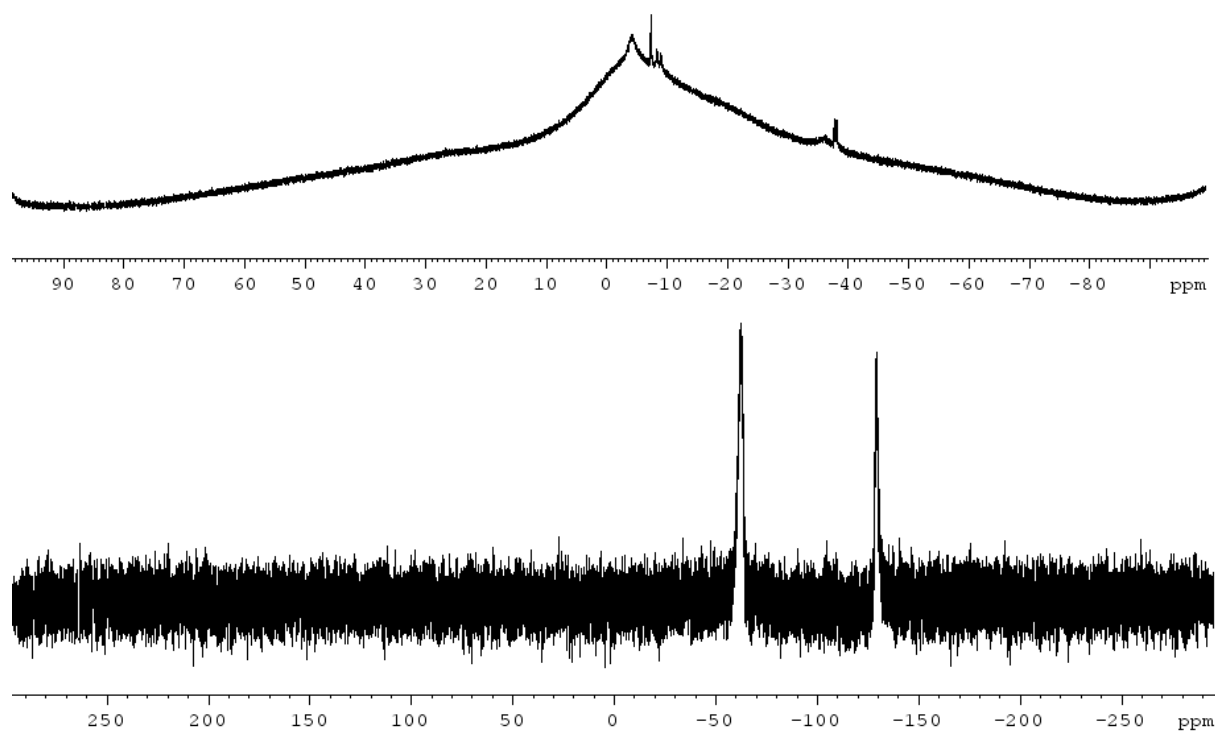

**Figure S16.**  $^{31}\text{P}\{^1\text{H}\}$  NMR and  $^{11}\text{B}\{^1\text{H}\}$  NMR (top) spectra of **1a** ( $c = 0.089$  mol/L) after stirring at r.t. for 24 h in the presence of 10 mol% of  $[(\eta^5\text{-}\eta^1\text{-C}_5\text{H}_4\text{C}_{10}\text{H}_{14})_2\text{Ti}]$ .

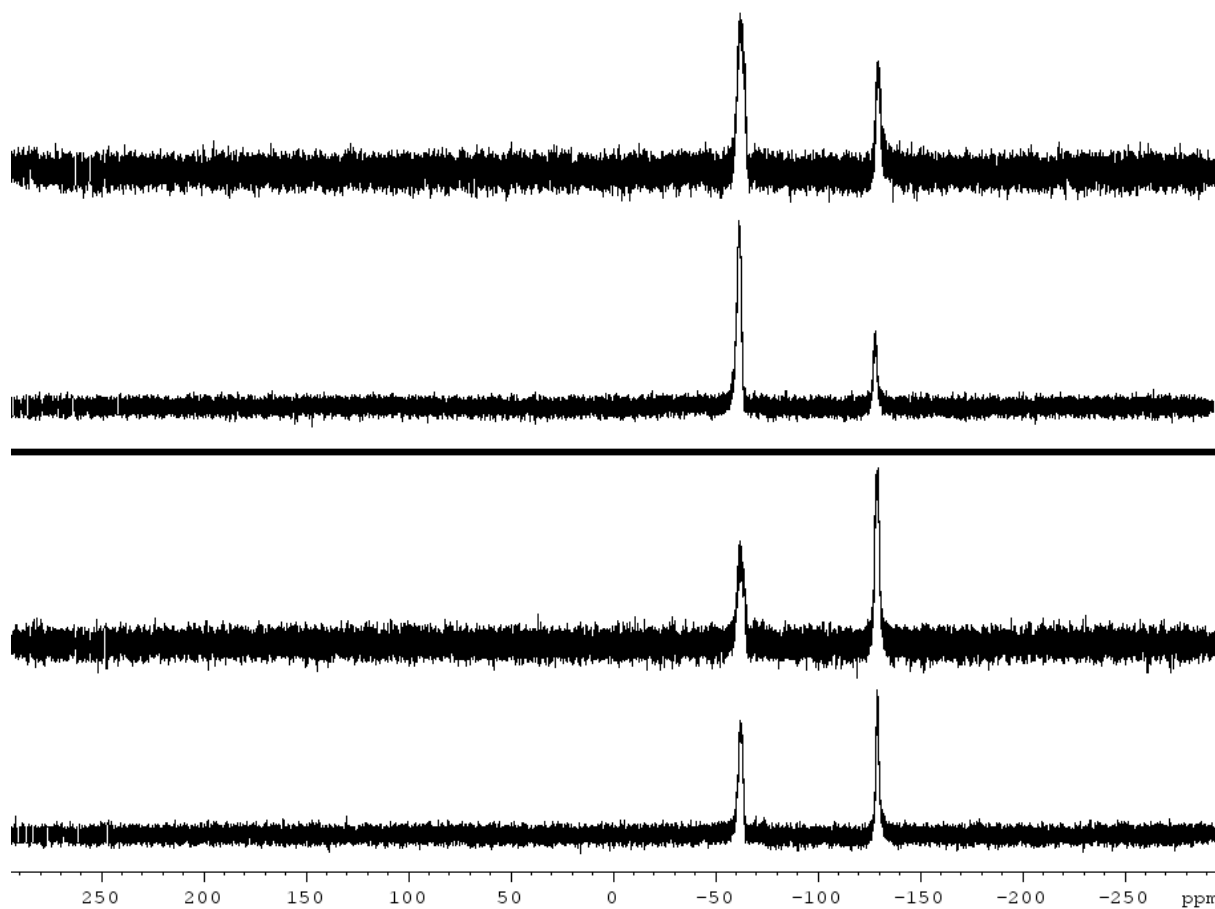

**Figure S17.**  $^{31}\text{P}$  NMR (top) and  $^{31}\text{P}\{^1\text{H}\}$  NMR (bottom) spectra of **1a** ( $c = 0.03$  mol/L) after stirring at r.t. for 210 min (lower half) and 42 h (upper half) in the presence of 10 mol% of  $[(\eta^5\text{-}\eta^1\text{-C}_5\text{H}_4\text{C}_{10}\text{H}_{14})_2\text{Ti}]$ .

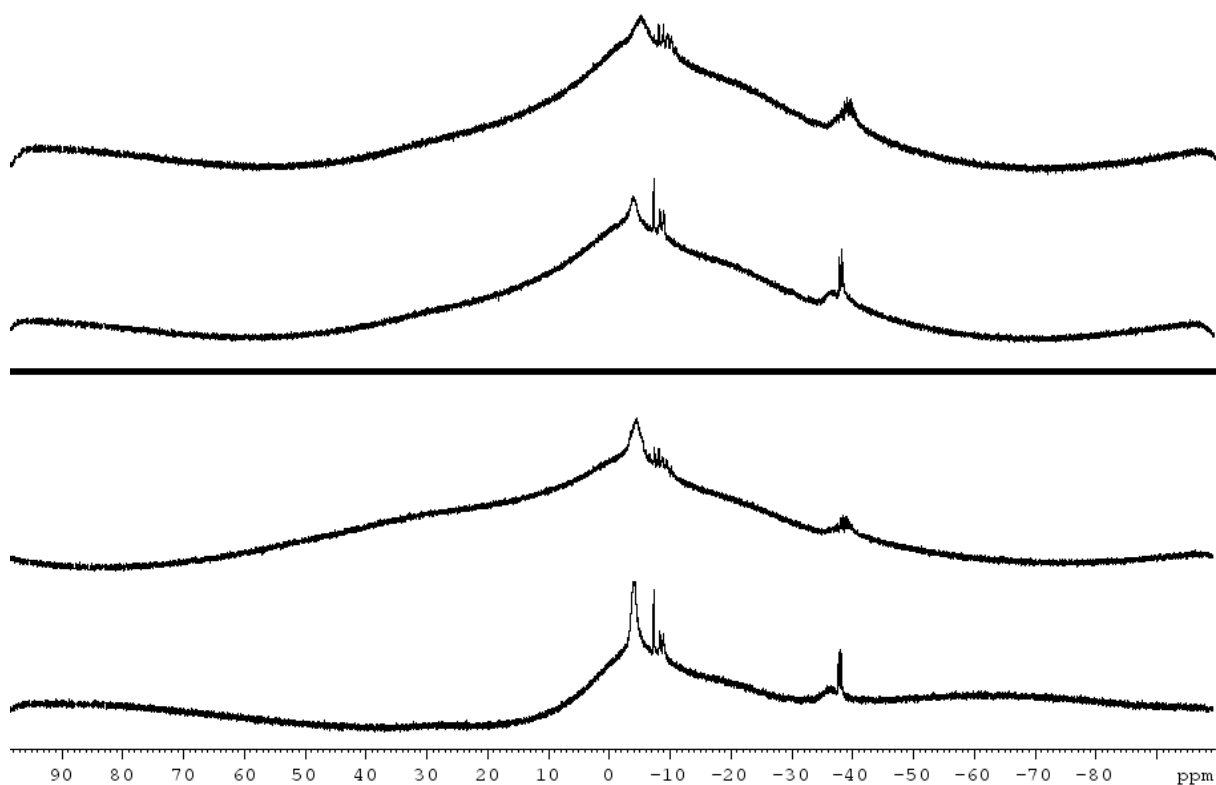

**Figure S18.**  $^{11}\text{B}$  NMR (top) and  $^{11}\text{B}\{^1\text{H}\}$  NMR (bottom) spectra of **1a** ( $c = 0.03$  mol/L) after stirring at r.t. for 210 min (lower half) and 42 h (upper half) in the presence of 10 mol% of  $[(\eta^5\text{-}\eta^1\text{-C}_5\text{H}_4\text{C}_{10}\text{H}_{14})_2\text{Ti}]$ .

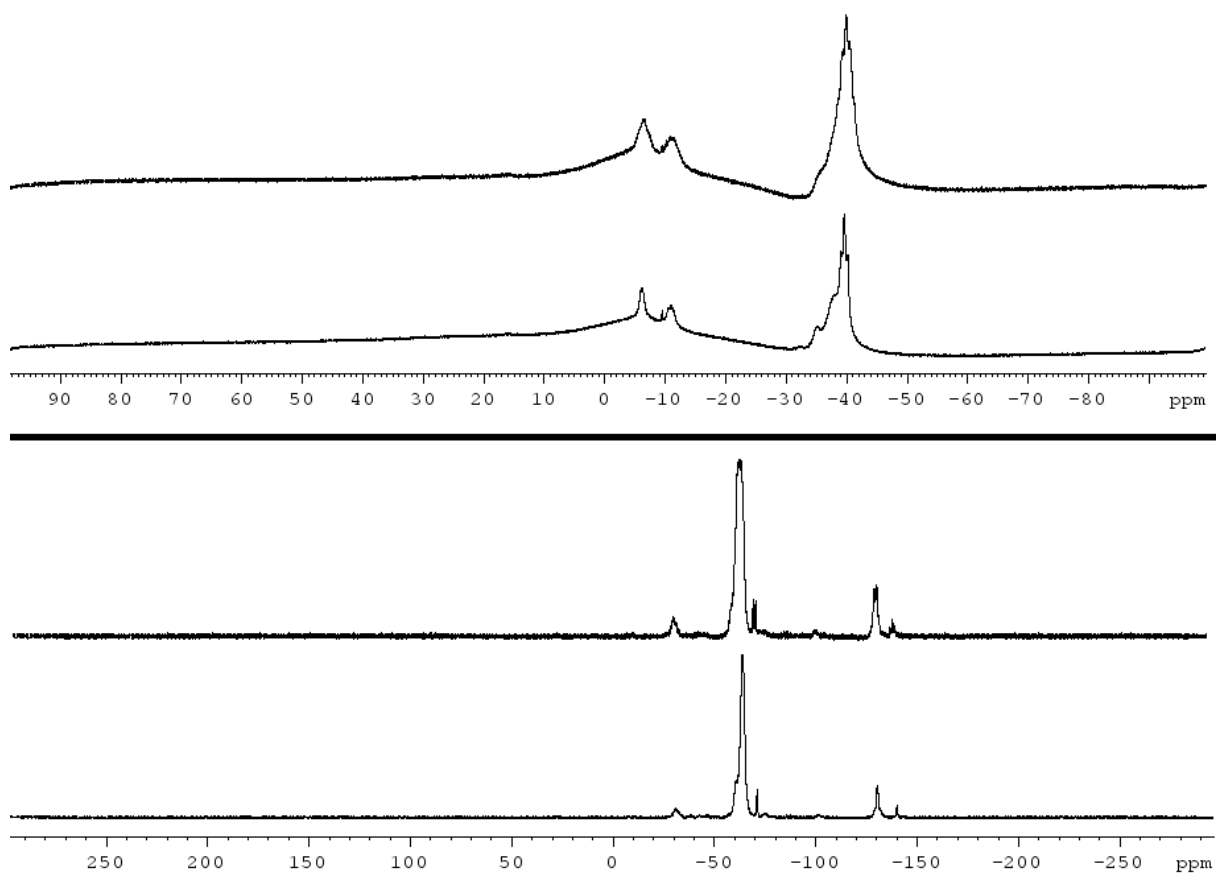

**Figure S19.**  $^{11}\text{B}$  NMR (top, upper half),  $^{11}\text{B}\{^1\text{H}\}$  NMR (bottom, upper half),  $^{31}\text{P}$  NMR (top, lower half), and  $^{31}\text{P}\{^1\text{H}\}$  NMR (bottom, lower half) spectra of **1b** ( $c = 0.5$  mol/L) after stirring at r.t. for 21 d in the presence of 5 mol% of  $[(\eta^5\text{-}\eta^1\text{-C}_5\text{H}_4\text{C}_{10}\text{H}_{14})_2\text{Ti}]$ .

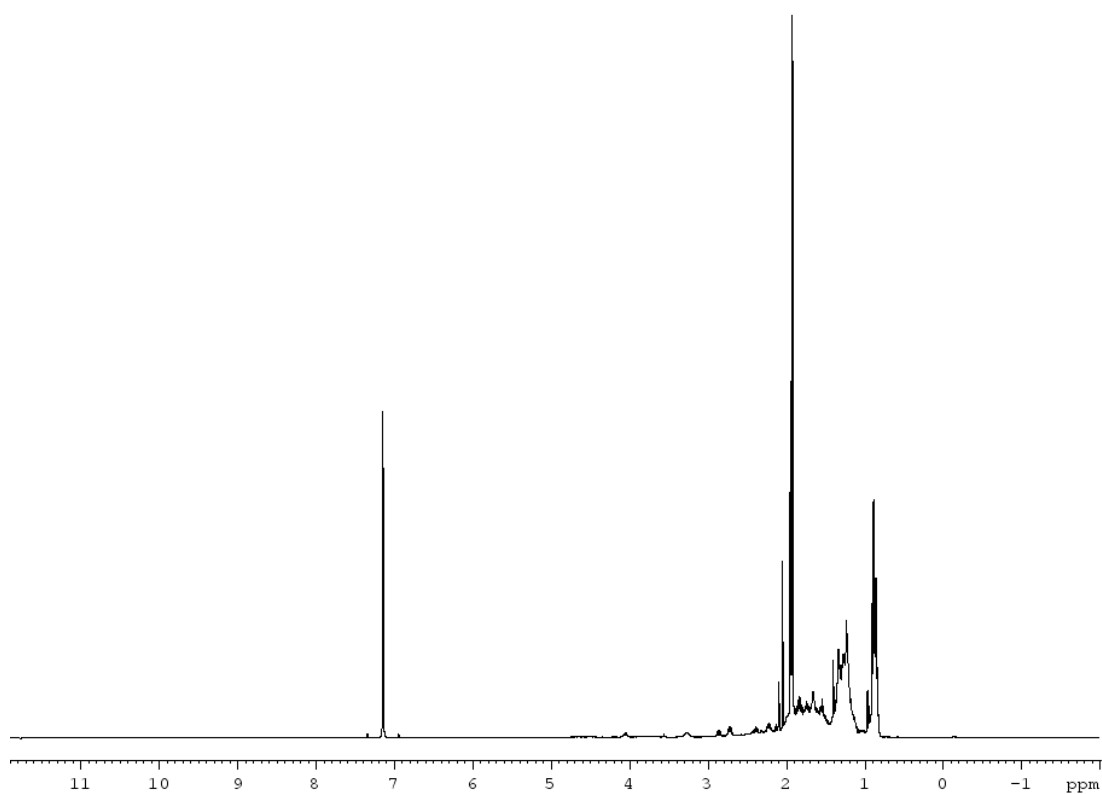

**Figure S20.**  $^1\text{H}$  NMR spectrum of neat **1c** after stirring at r.t. for 4 d

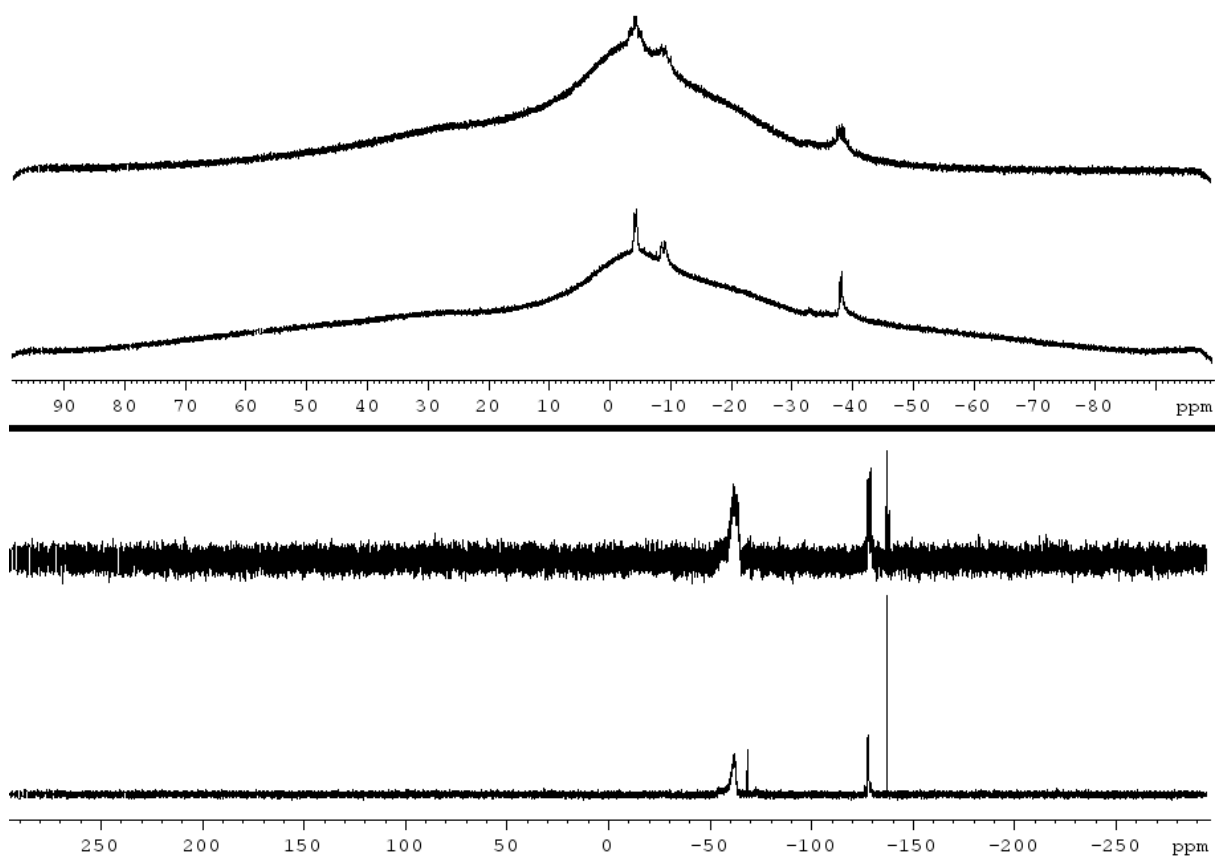

**Figure S21.**  $^{11}\text{B}$  NMR (top, upper half),  $^{11}\text{B}\{^1\text{H}\}$  NMR (bottom, upper half),  $^{31}\text{P}$  NMR (top, lower half), and  $^{31}\text{P}\{^1\text{H}\}$  NMR (bottom, lower half) spectra of **1c** (neat) after stirring at r.t. for 4 d

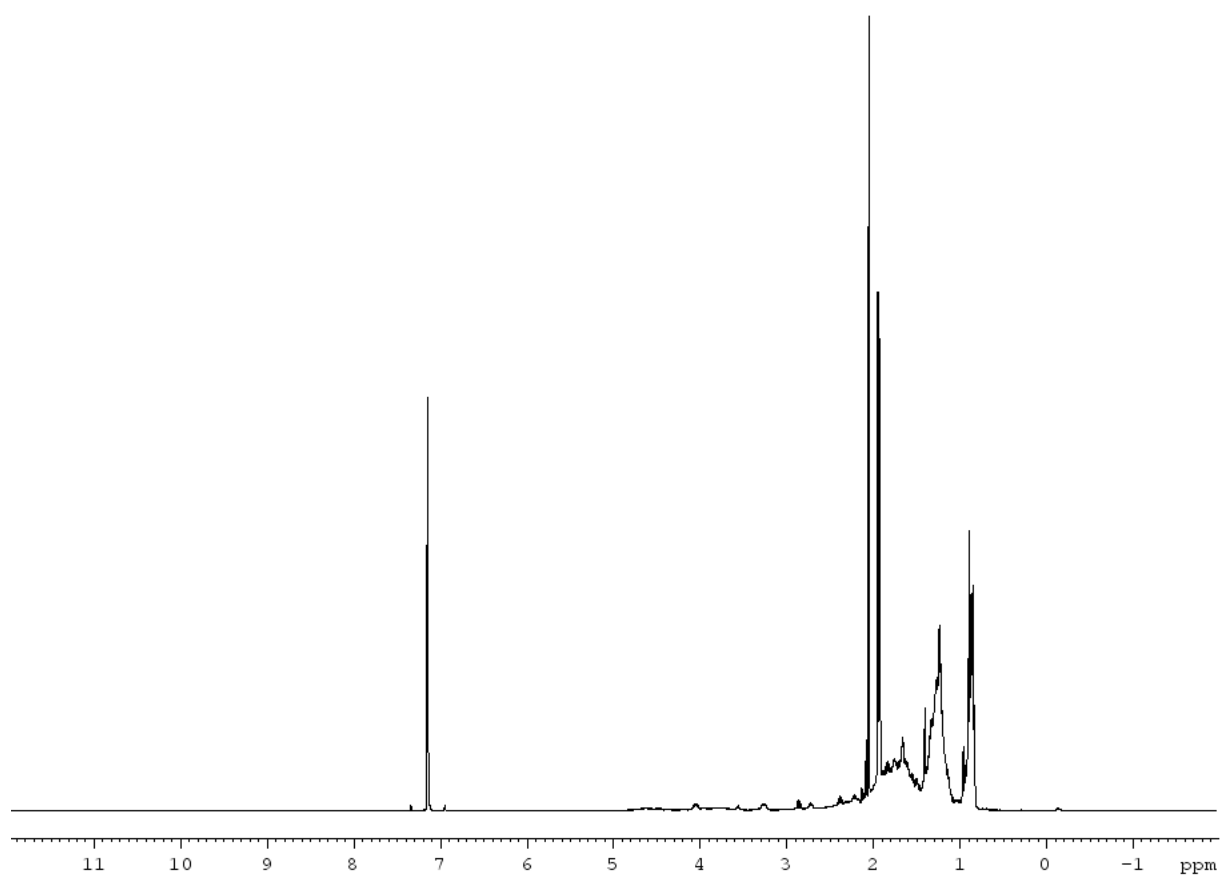

**Figure S22.**  $^1\text{H}$  NMR spectrum of neat **1c** after stirring for 16h at 323 K

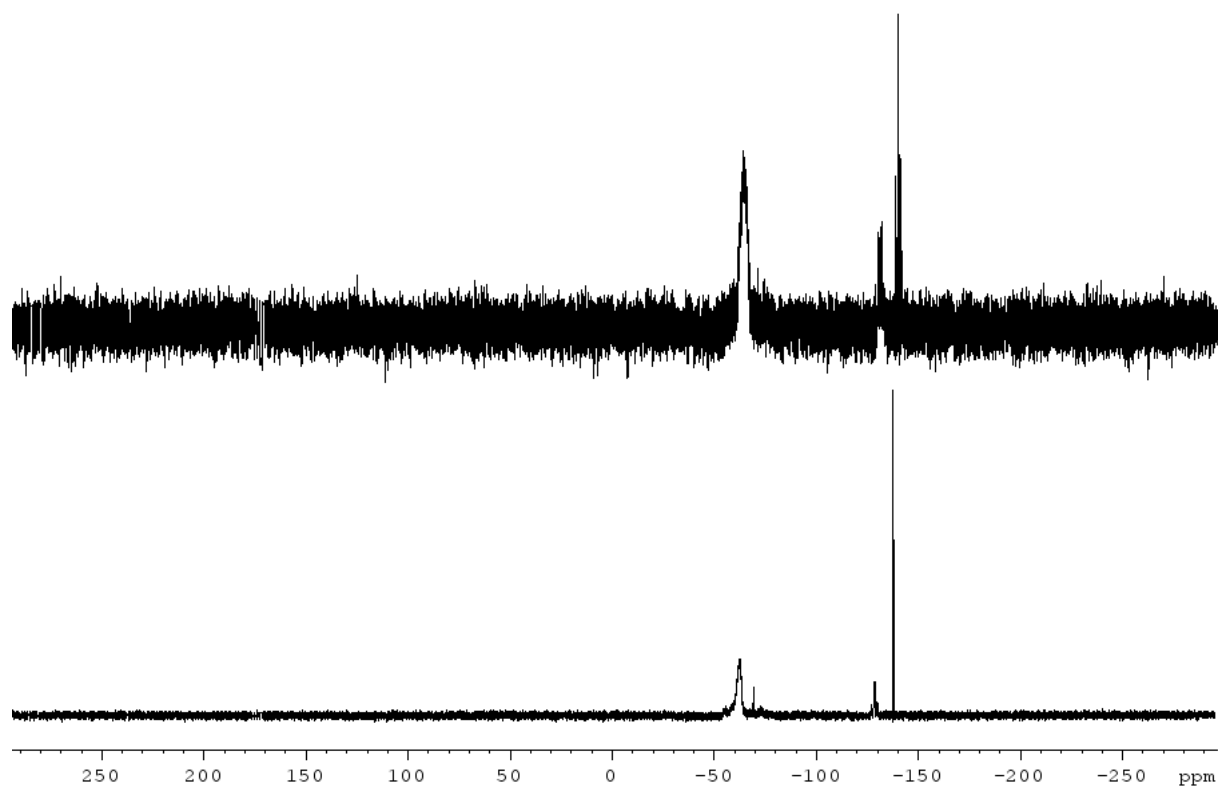

**Figure S23.**  $^{31}\text{P}$  NMR (top) and  $^{31}\text{P}\{^1\text{H}\}$  NMR (bottom) spectra of **1c** (neat) after stirring for 16h at 323 K

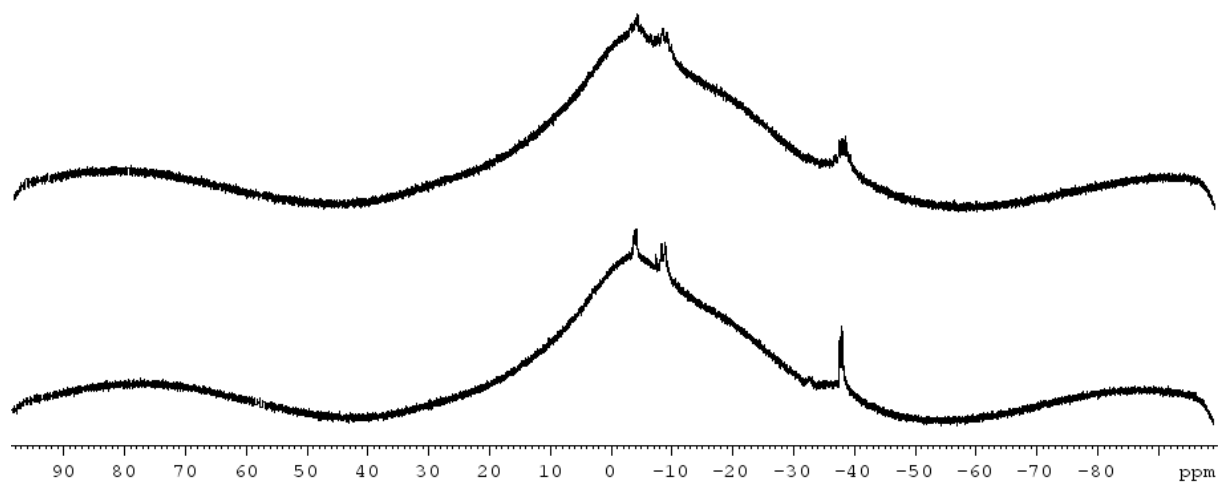

**Figure S24.**  $^{11}\text{B}$  NMR (top) and  $^{11}\text{B}\{^1\text{H}\}$  NMR (bottom) spectra of **1c** (neat) after stirring for 16h at 323 K

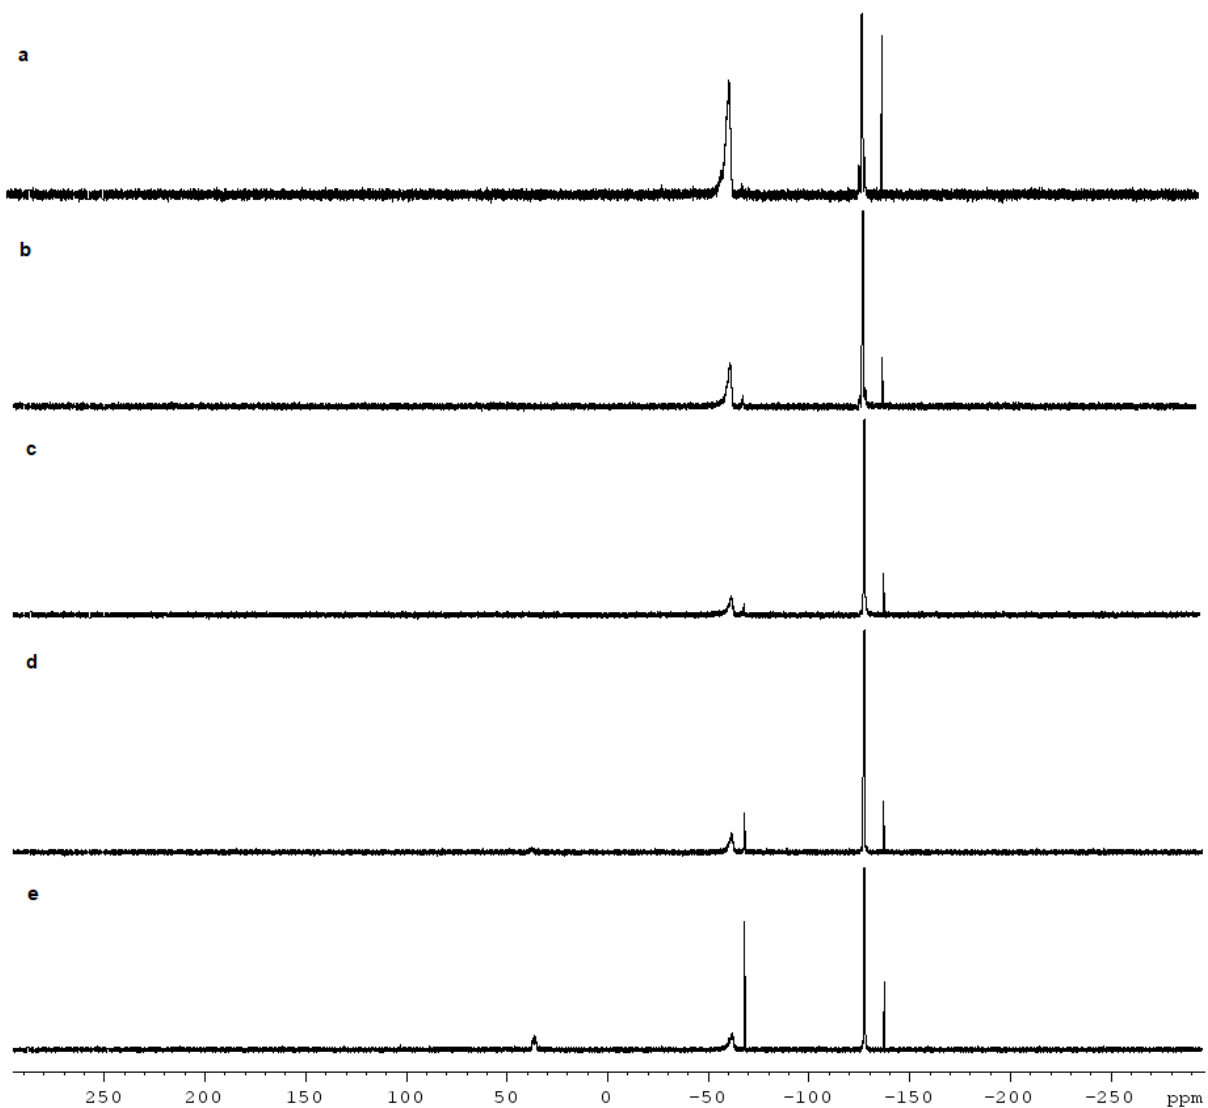

**Figure S25.**  $^{31}\text{P}\{^1\text{H}\}$  NMR spectra of **1c** ( $c = 0.4$  mol/L) after stirring for 21d (a), 7d (b), 16h (c), 90 min (d), 30 min (e) at r.t. in the presence of 4 mol% of  $[(\eta^5:\eta^1\text{-C}_5\text{H}_4\text{C}_{10}\text{H}_{14})_2\text{Ti}]$ .

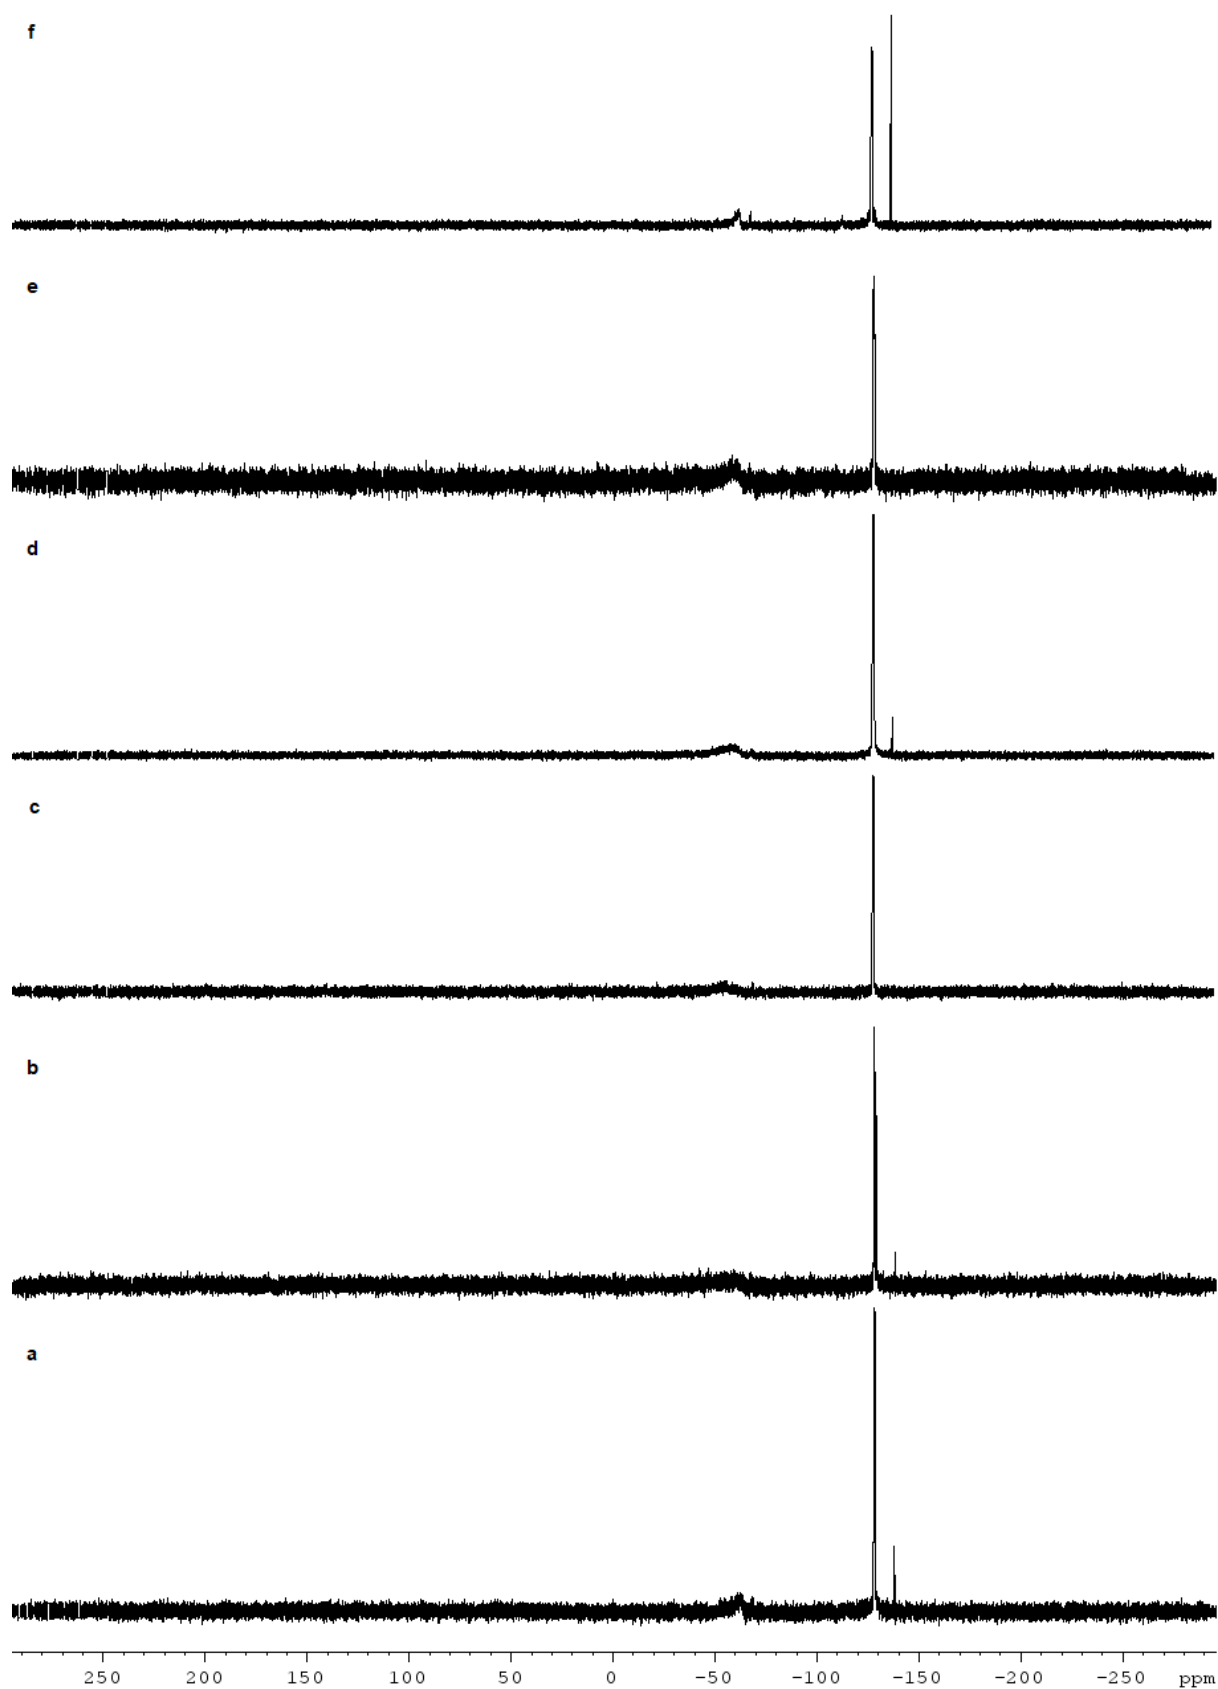

**Figure S26.**  $^{31}\text{P}\{^1\text{H}\}$  NMR spectra of **1c** in toluene at r.t for 3h under different conditions: a) 5 mol% [Ti], c (**1c**) = 0.1 mol/L; b) 10 mol% [Ti], c (**1c**) = 0.1 mol/L; c) 10 mol% [Ti], c (**1c**) = 0.1 mol/L, in 1:1 mixture of THF and toluene; d) 10 mol% [Ti], c (**1c**) = 0.2 mol/L; e) 25 mol% [Ti], c (**1c**) = 0.1 mol/L; f) in absence of [Ti], c (**1c**) = 0.1 mol/L

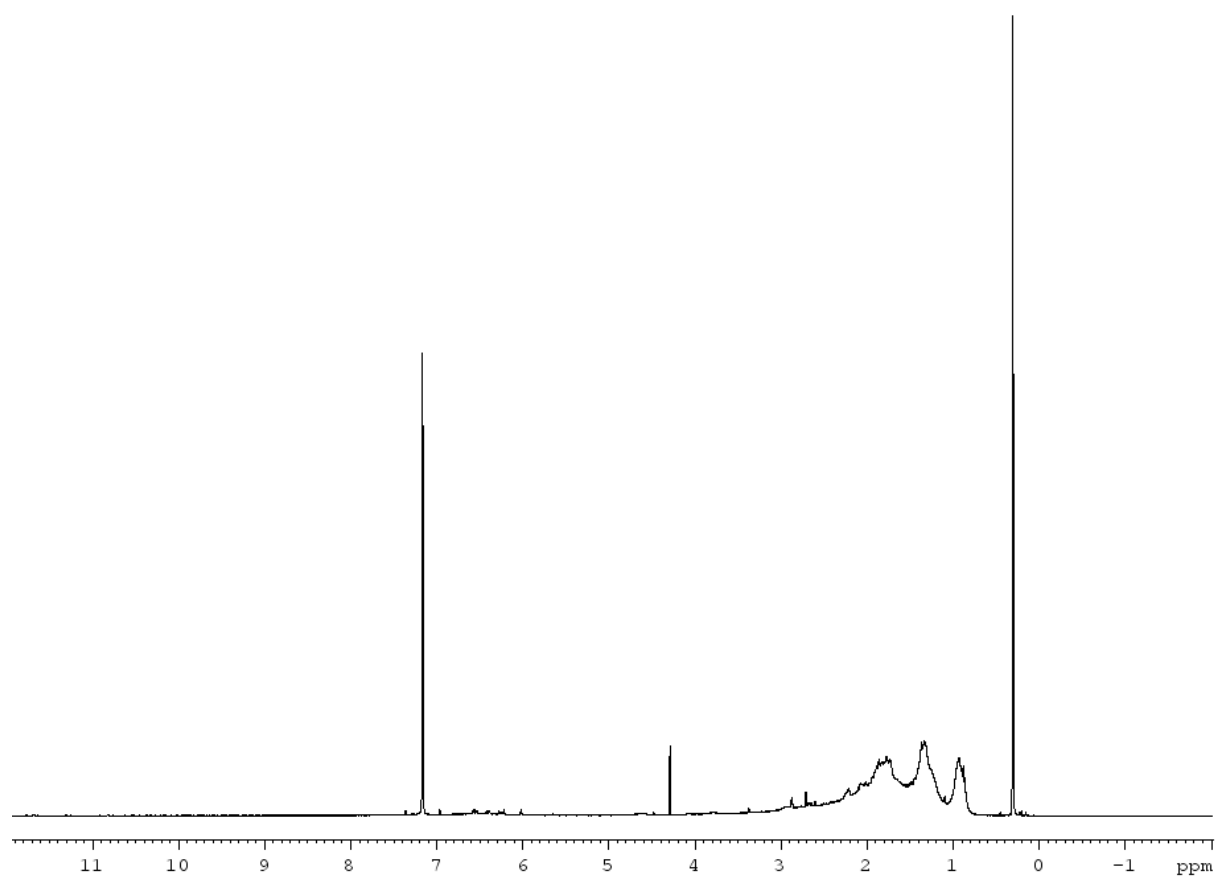

**Figure S27.**  $^1\text{H}$  NMR spectrum of isolated poly-1c in  $\text{C}_6\text{D}_6$

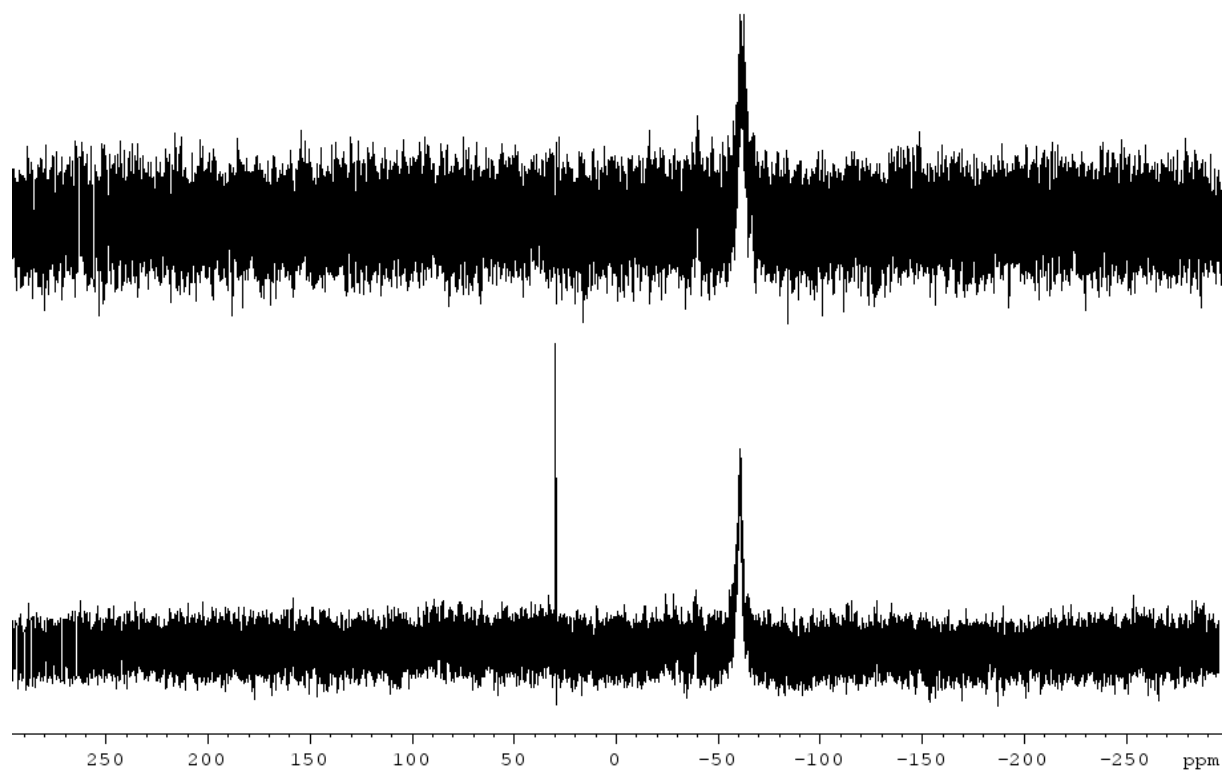

**Figure S28.**  $^{31}\text{P}$  NMR (top) and  $^{31}\text{P}\{^1\text{H}\}$  NMR (bottom) spectra of isolated poly-1c in  $\text{C}_6\text{D}_6$

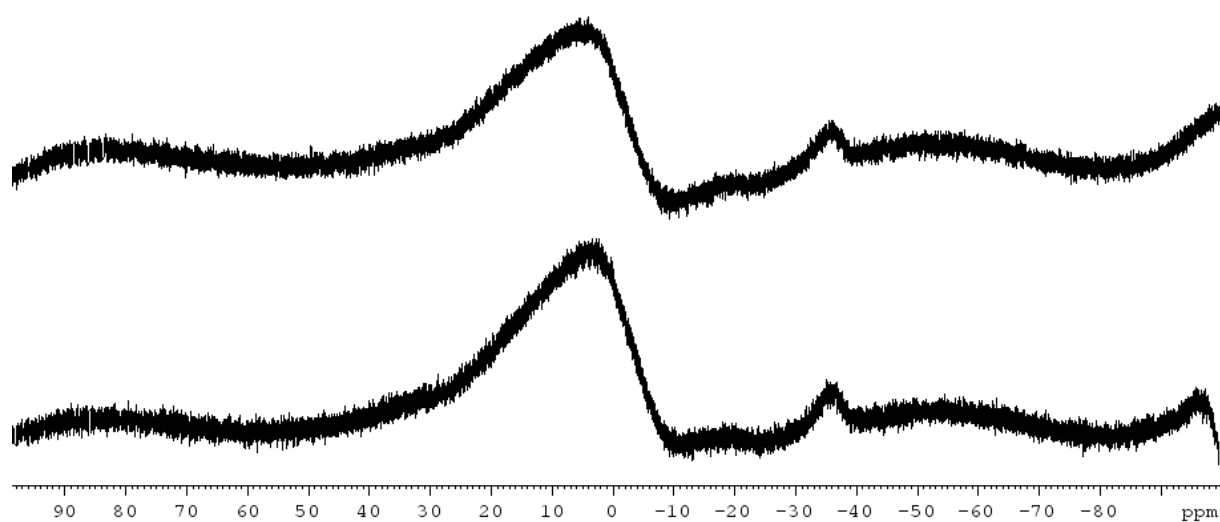

**Figure S29.**  $^{11}\text{B}$  NMR (top) and  $^{11}\text{B}\{^1\text{H}\}$  NMR (bottom) spectra of isolated poly-**1c** in  $\text{C}_6\text{D}_6$

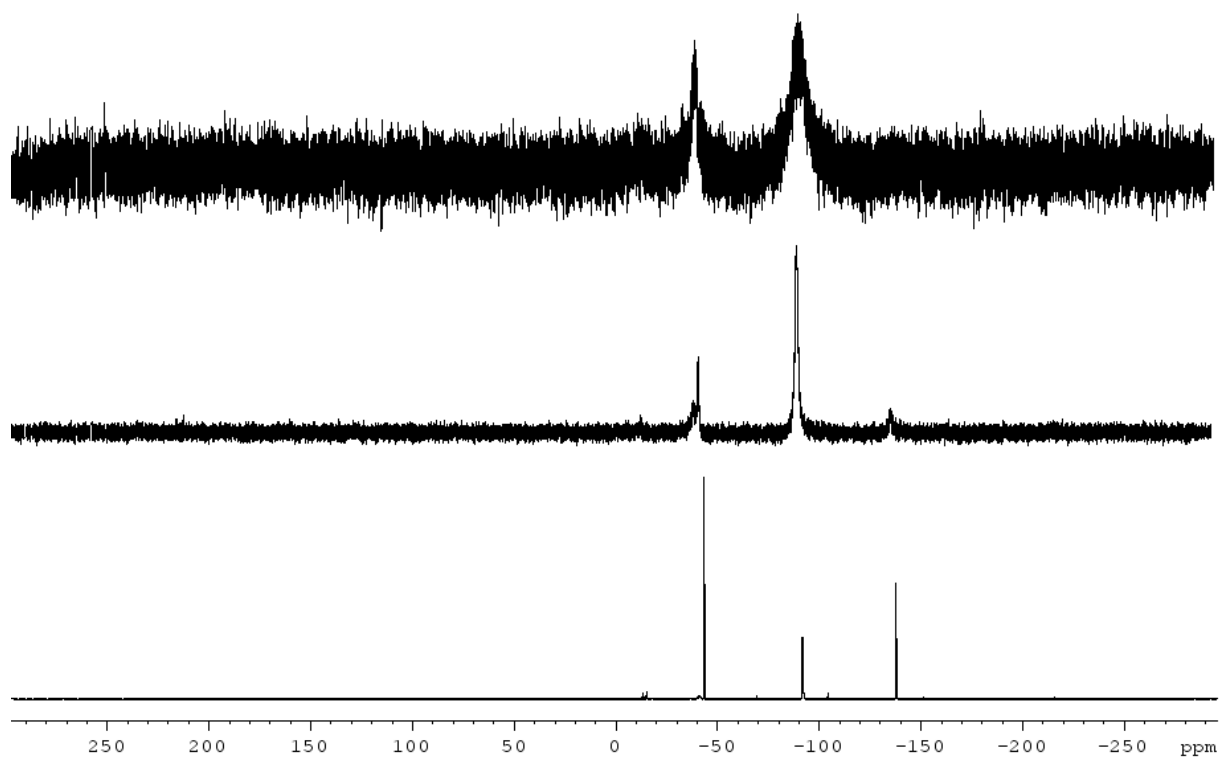

**Figure S30.**  $^{31}\text{P}\{^1\text{H}\}$  NMR spectra of **2** in toluene after 3h at r.t. in the absence of [Ti] (bottom), in the presence of 5mol% [Ti] (middle) and in the presence of 10 mol% [Ti] (top)

## References.

1. Stauber, A.; Jurca, T.; Marquardt, C.; Fleischmann, M.; Seidl, M.; Whittell, G.R.; Manners, I.; Scheer, M. A Convenient Route to Monoalkyl - Substituted Phosphanylboranes (HRP–BH<sub>2</sub>–NMe<sub>3</sub>): Prospective Precursors to Poly [(alkylphosphino) boranes]. *Eur. J. Inorg. Chem.* **2016**, 2016, 2684–2687.
